# Supplementary material
Source: PubMed Central journal article supplement (PMC8290961)

## Supporting Information

# Rhodium(III)-Catalyzed Three-Component 1,2-Diamination of Unactivated Terminal Alkenes

Sumin Lee, Young Jin Jang, Erik J. T. Phipps, Honghui Lei and Tomislav Rovis\*

Department of Chemistry, Columbia University, New York, New York 10027

## Contents

Copy of  $^1\text{H}$  and  $^{13}\text{C}$  NMR Spectra

S2-S16

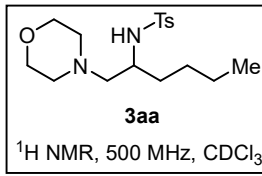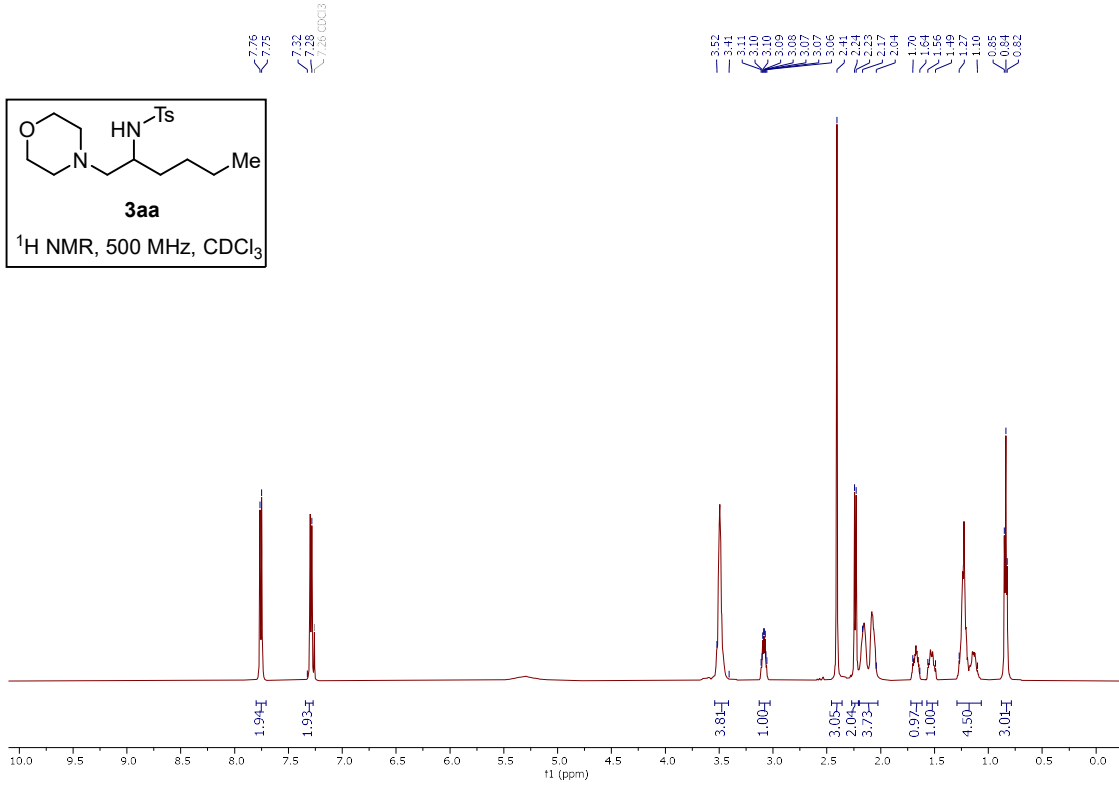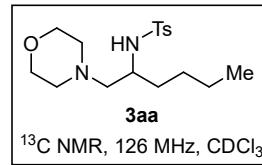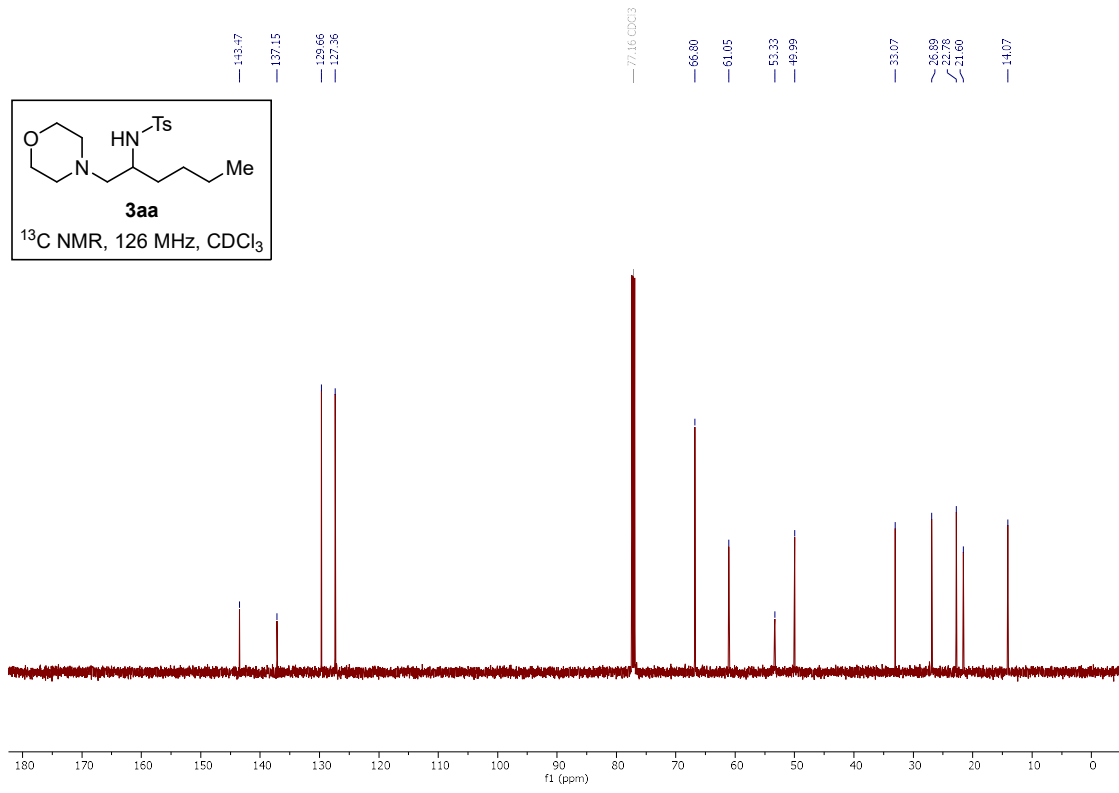

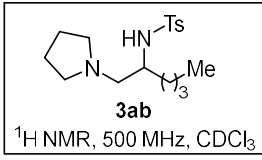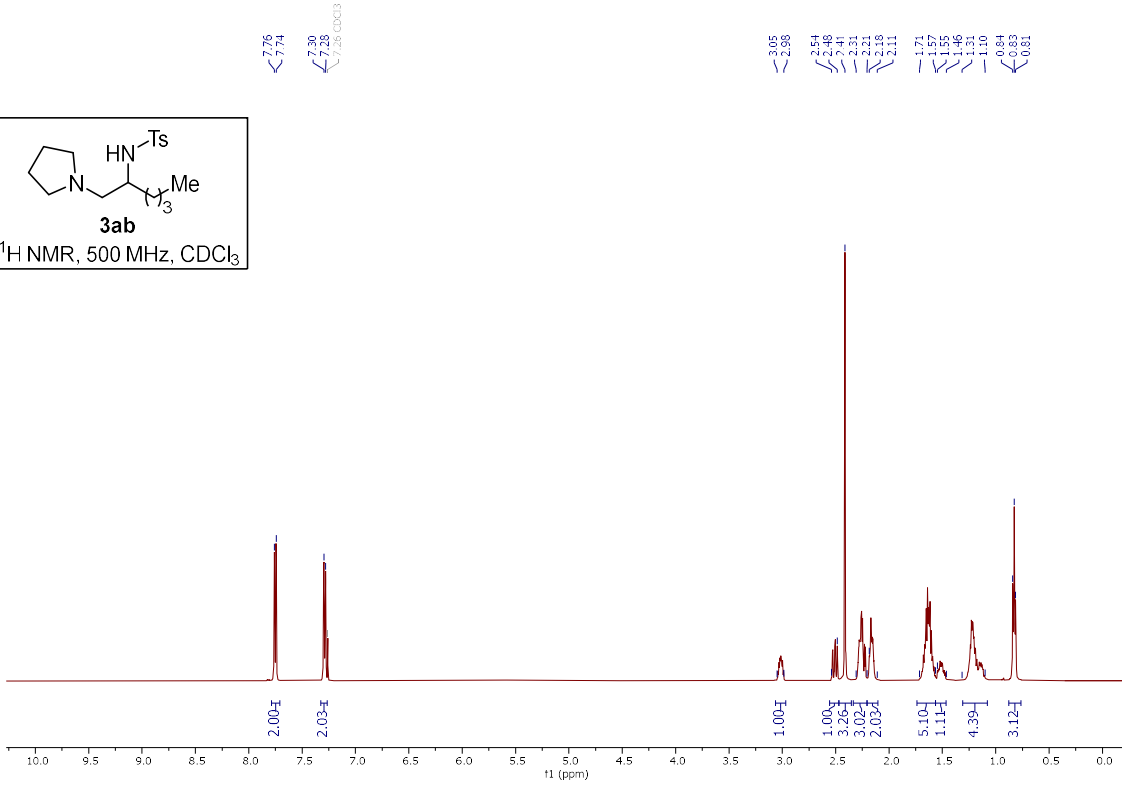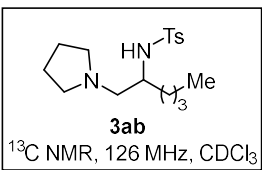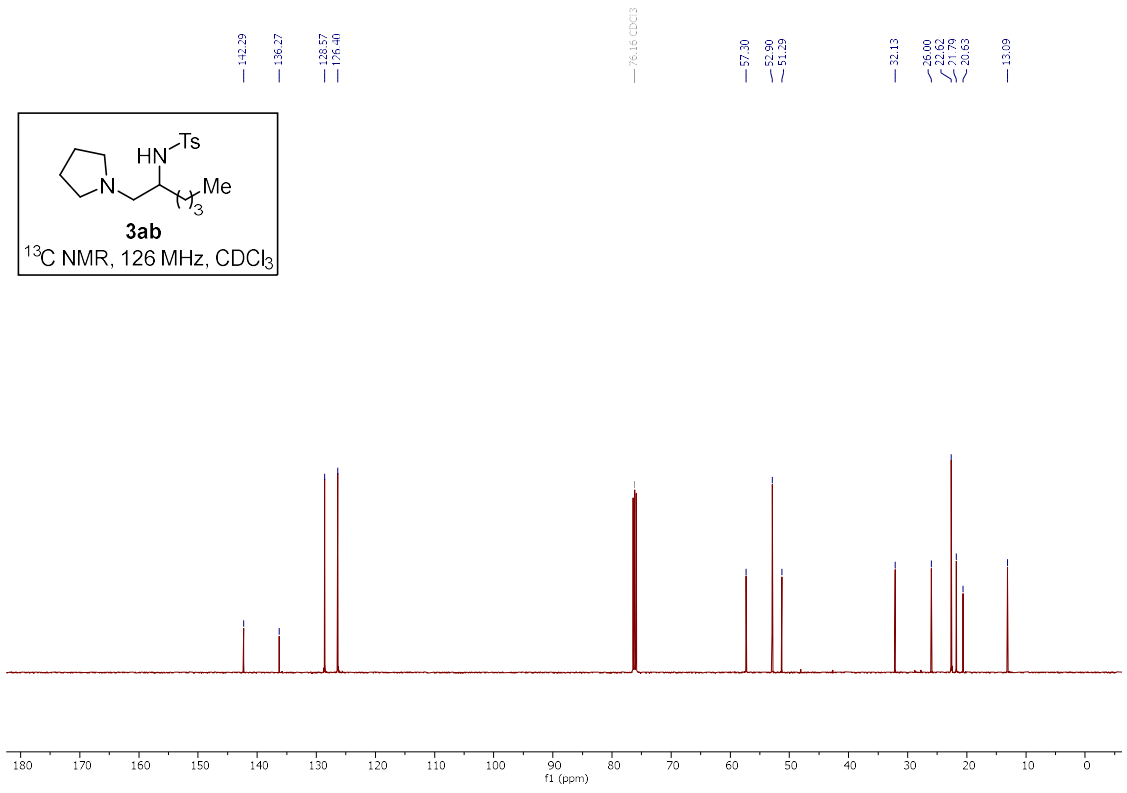

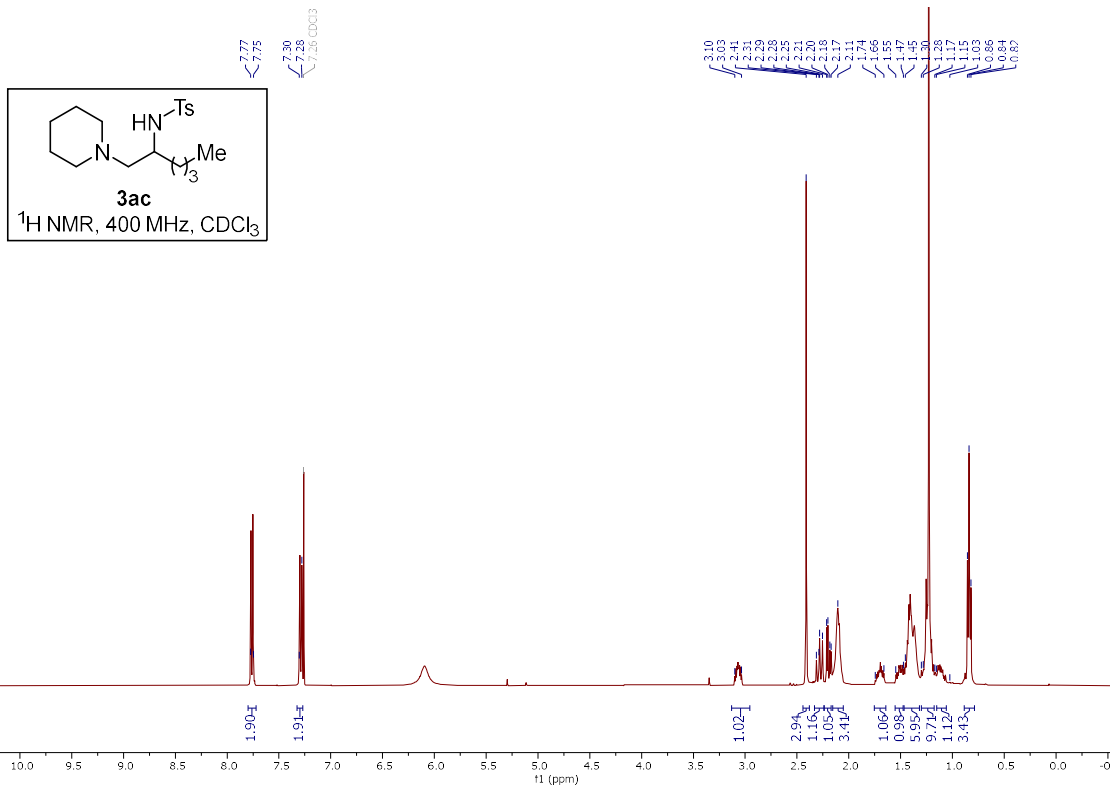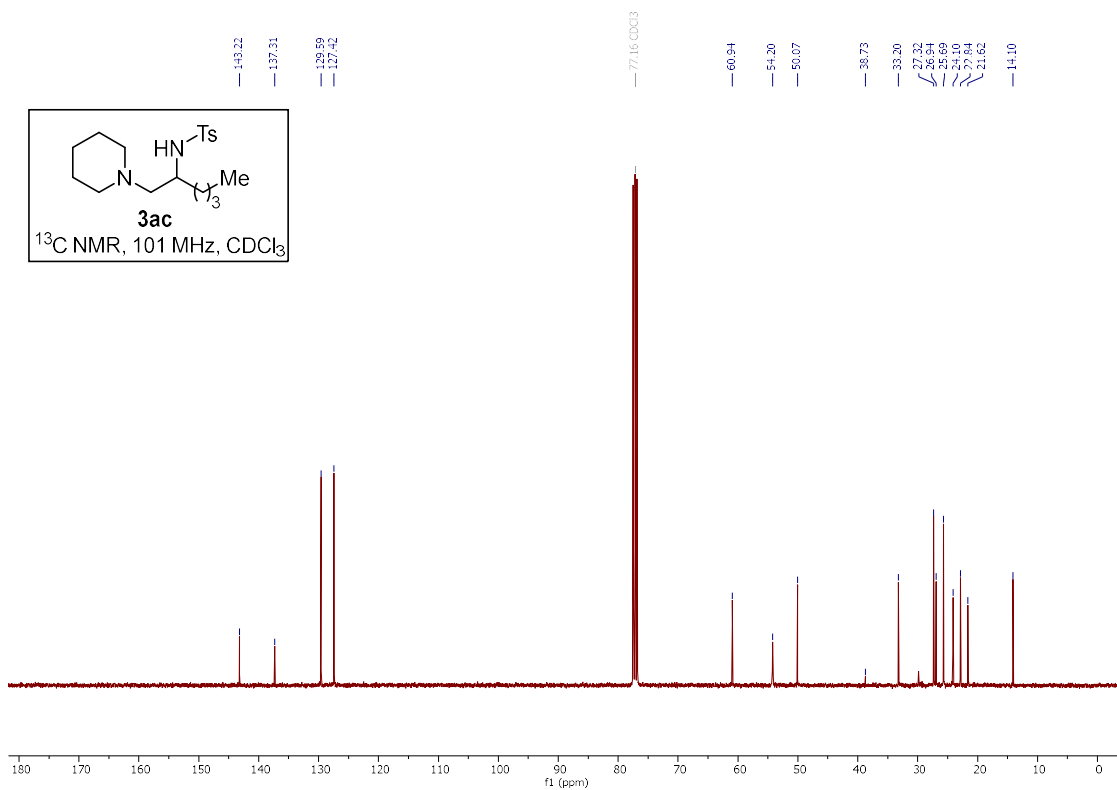

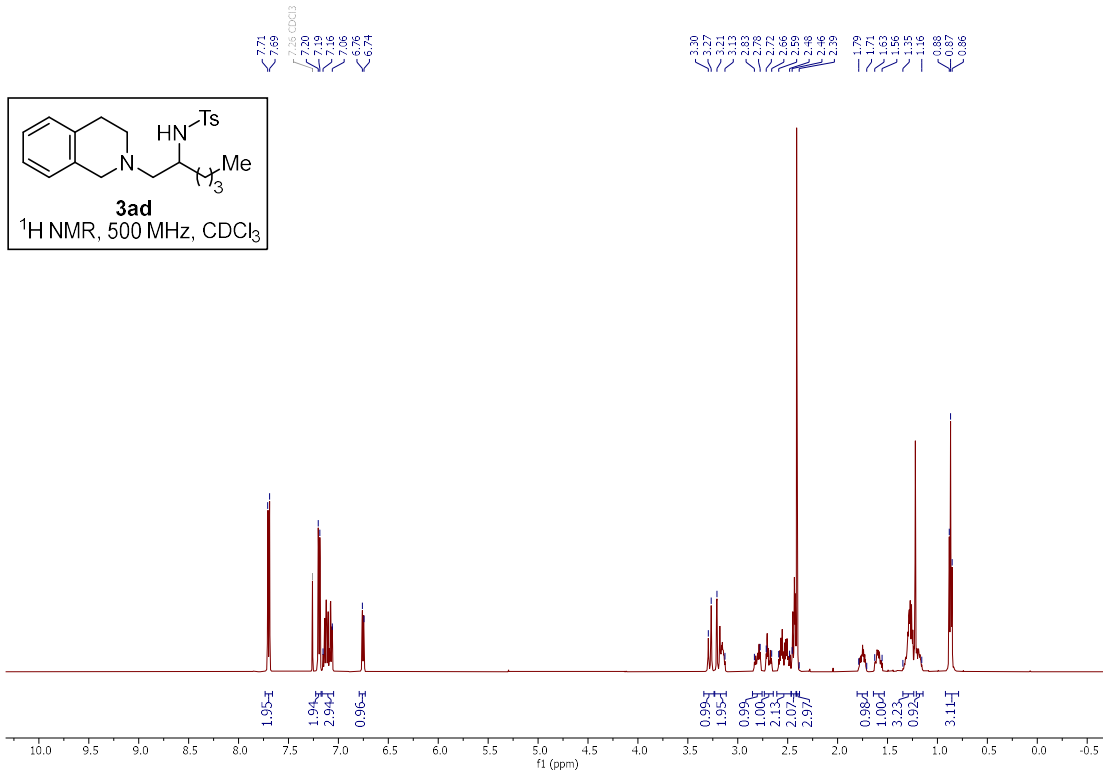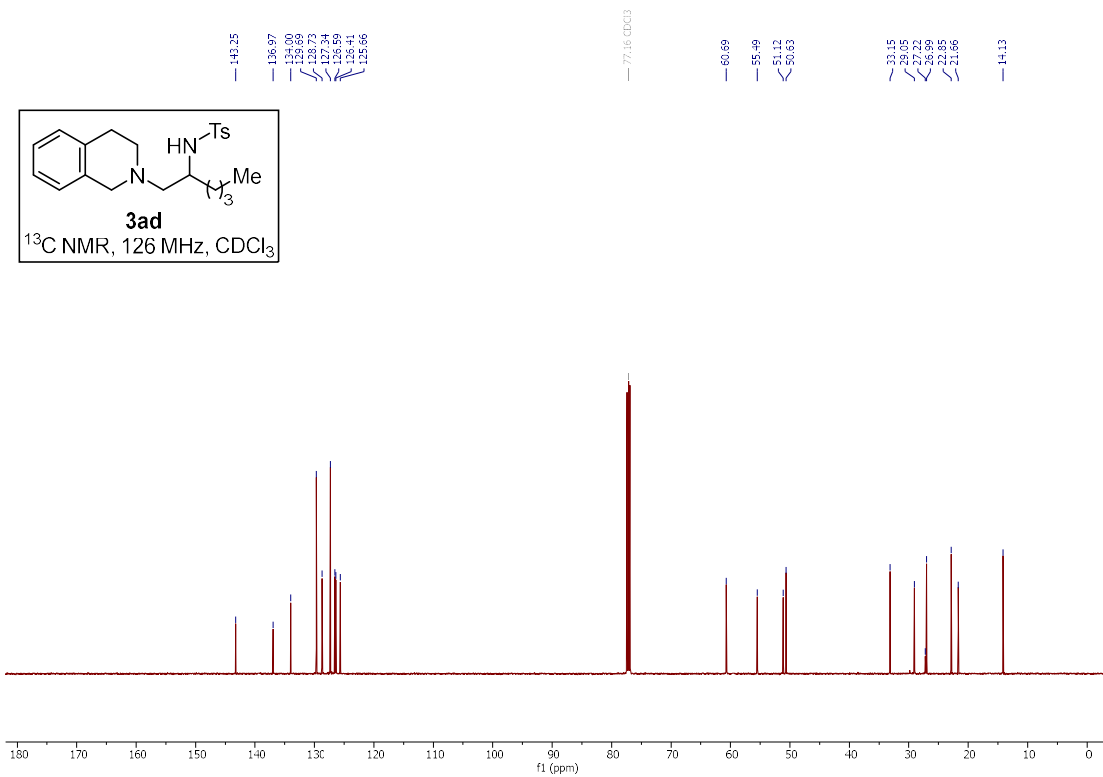

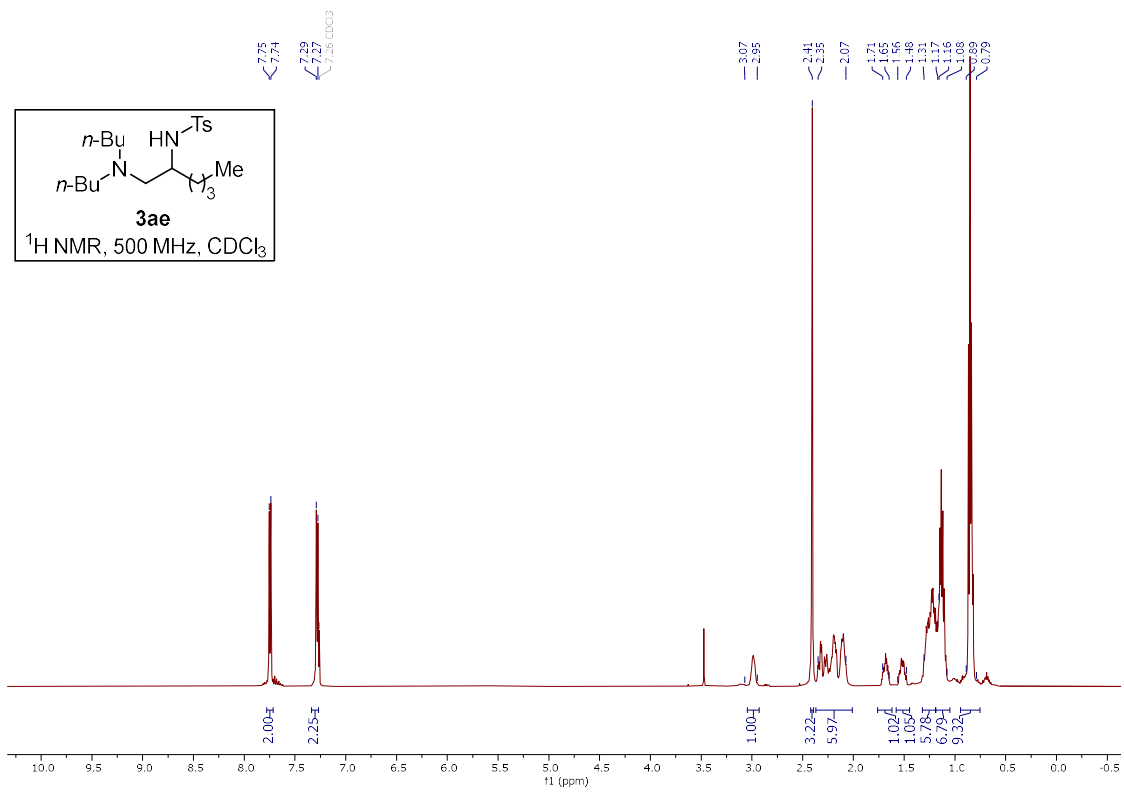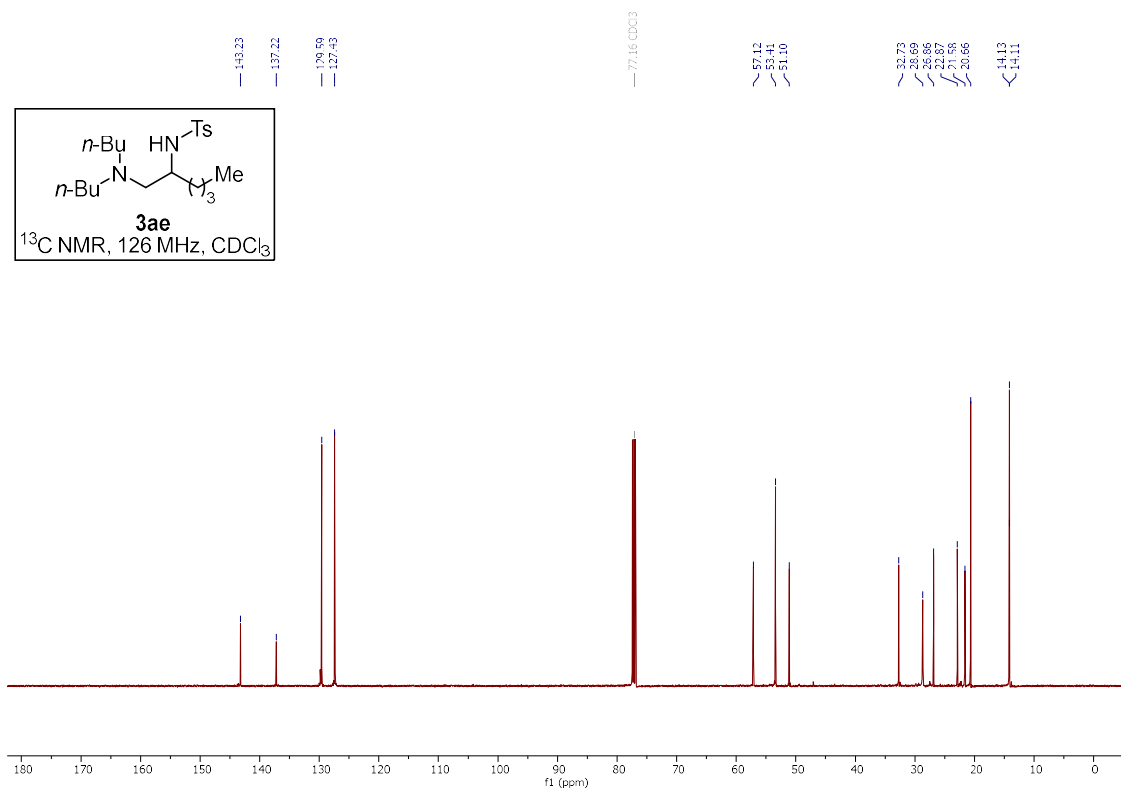

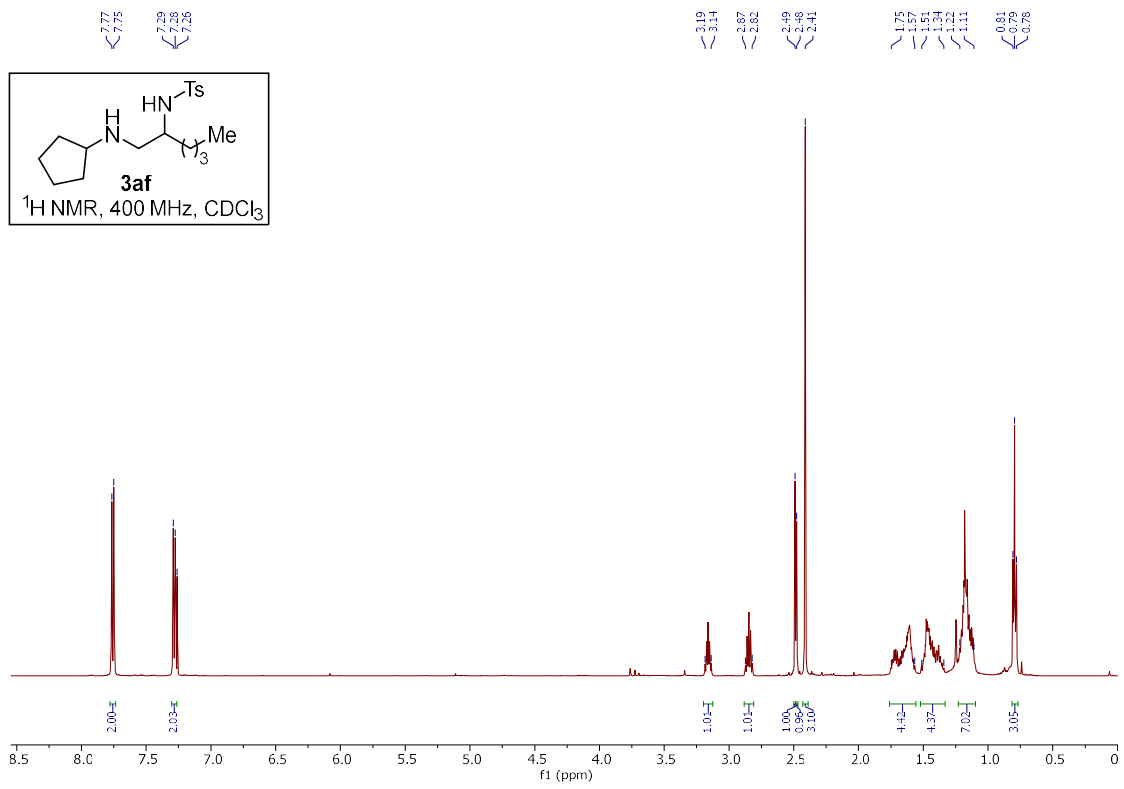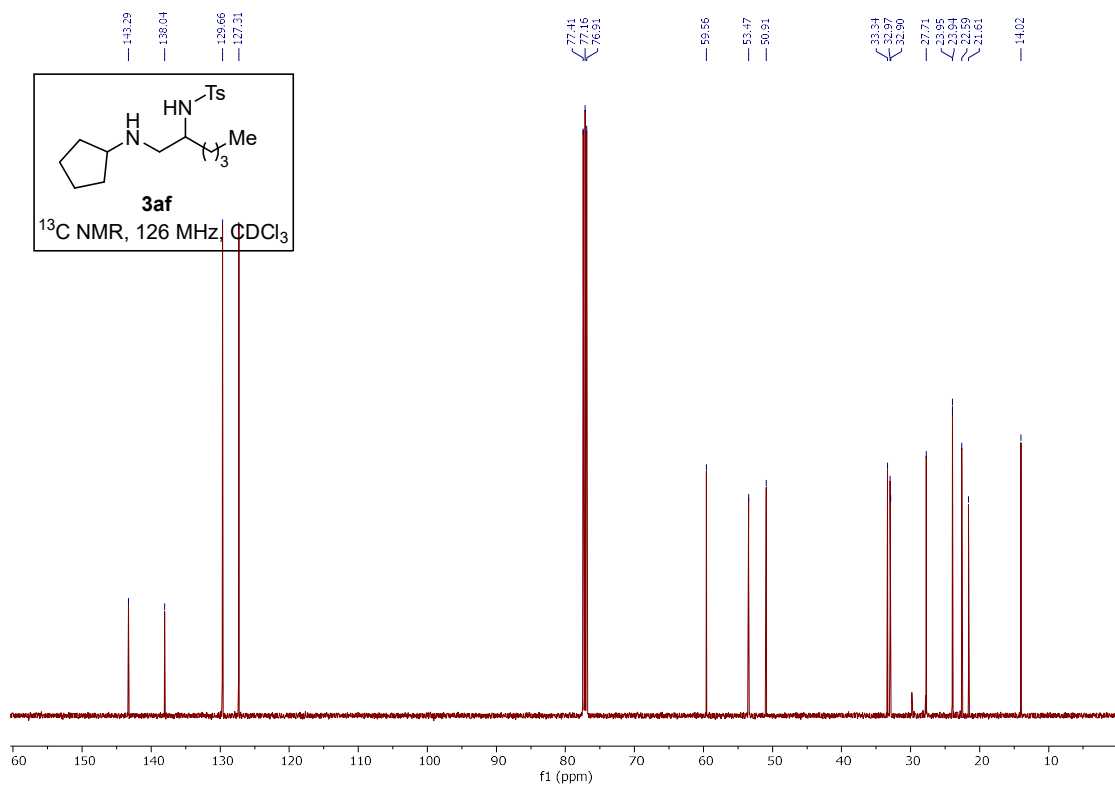

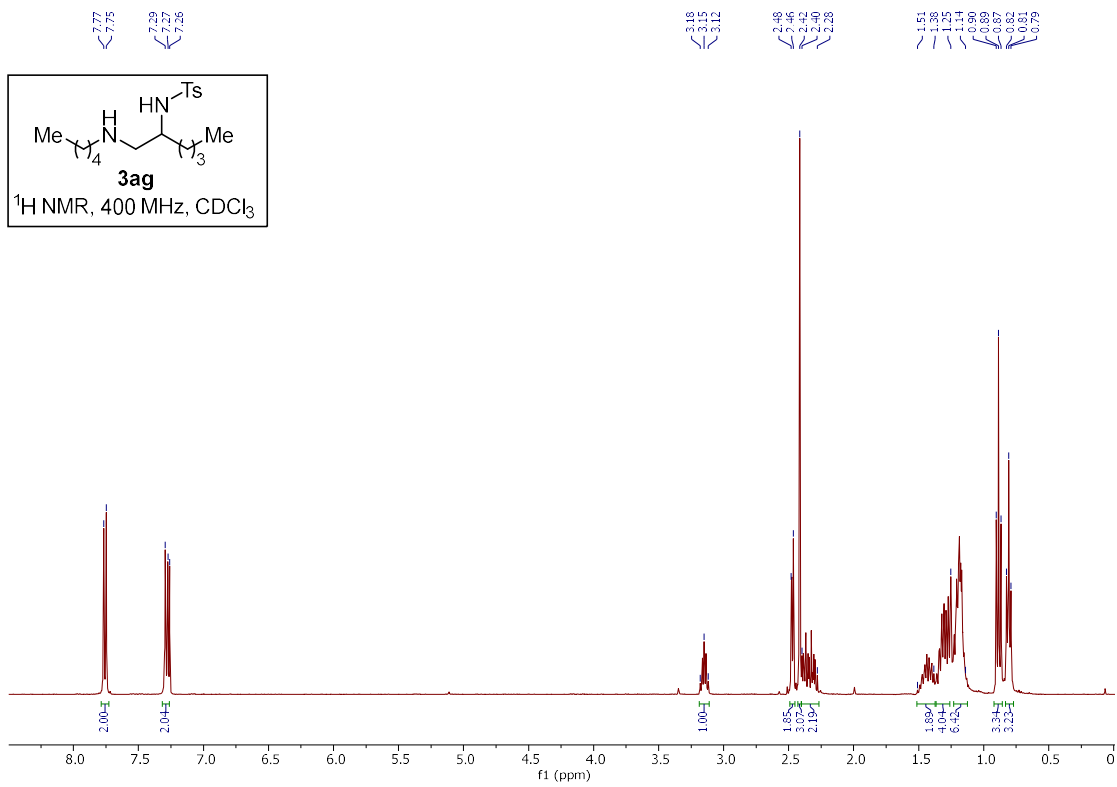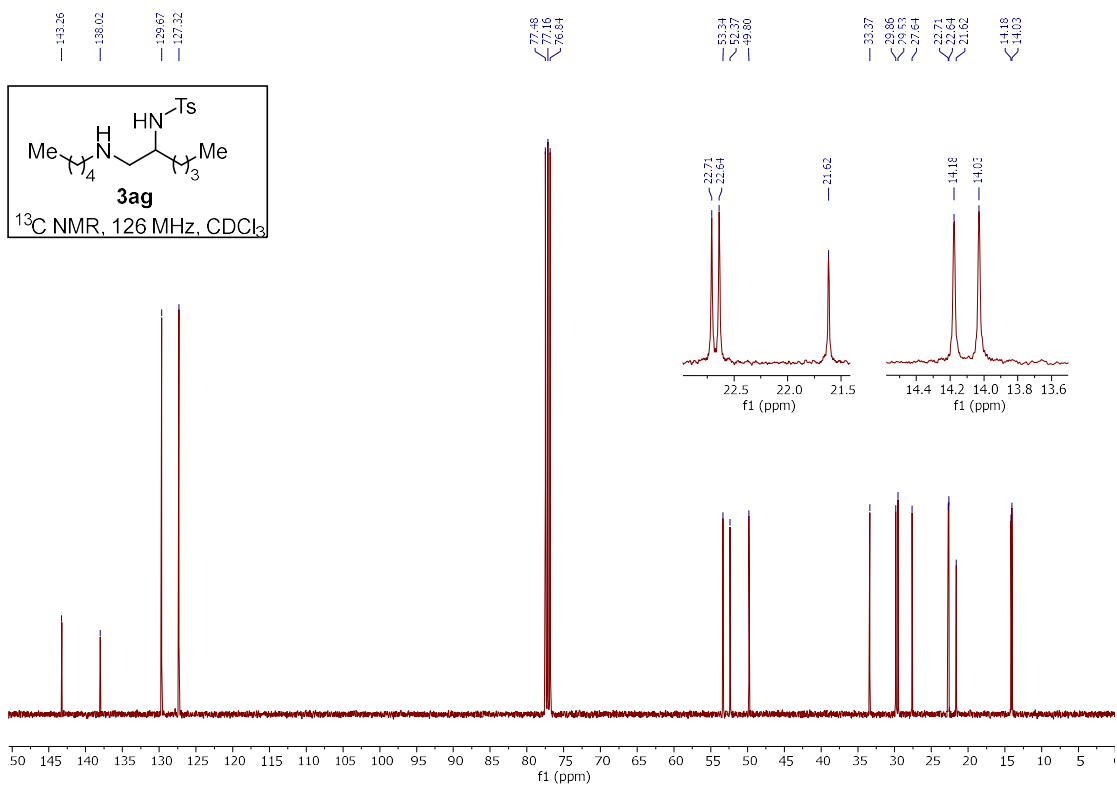



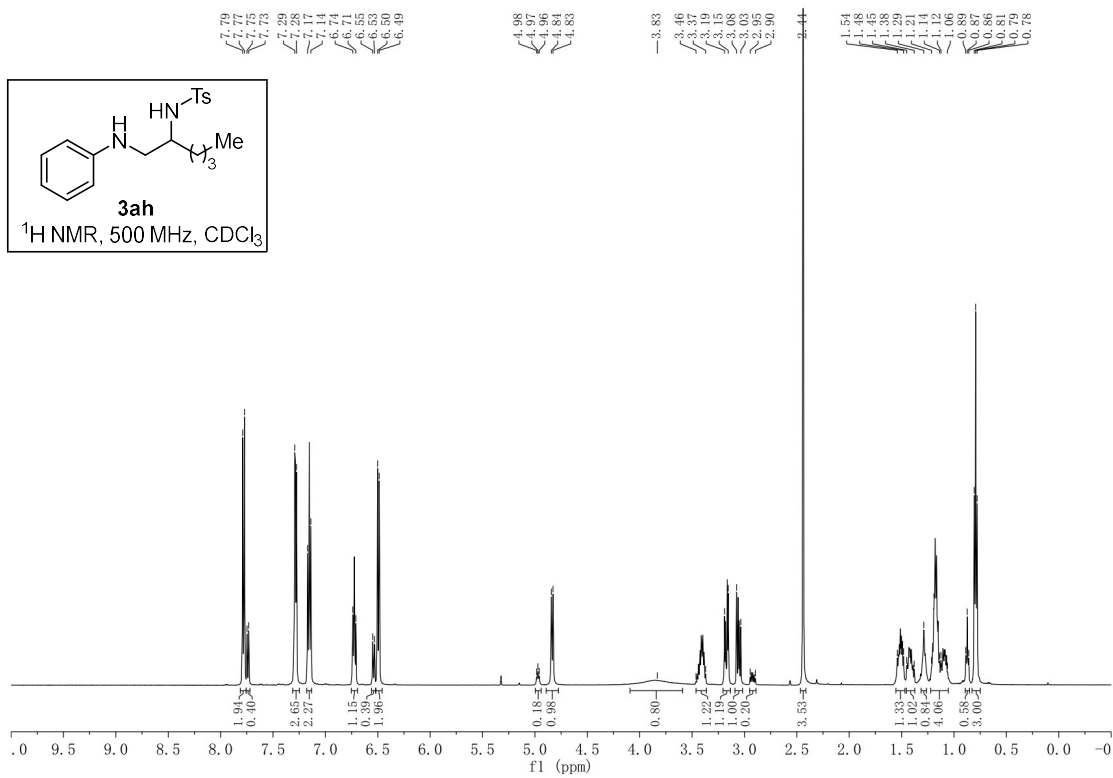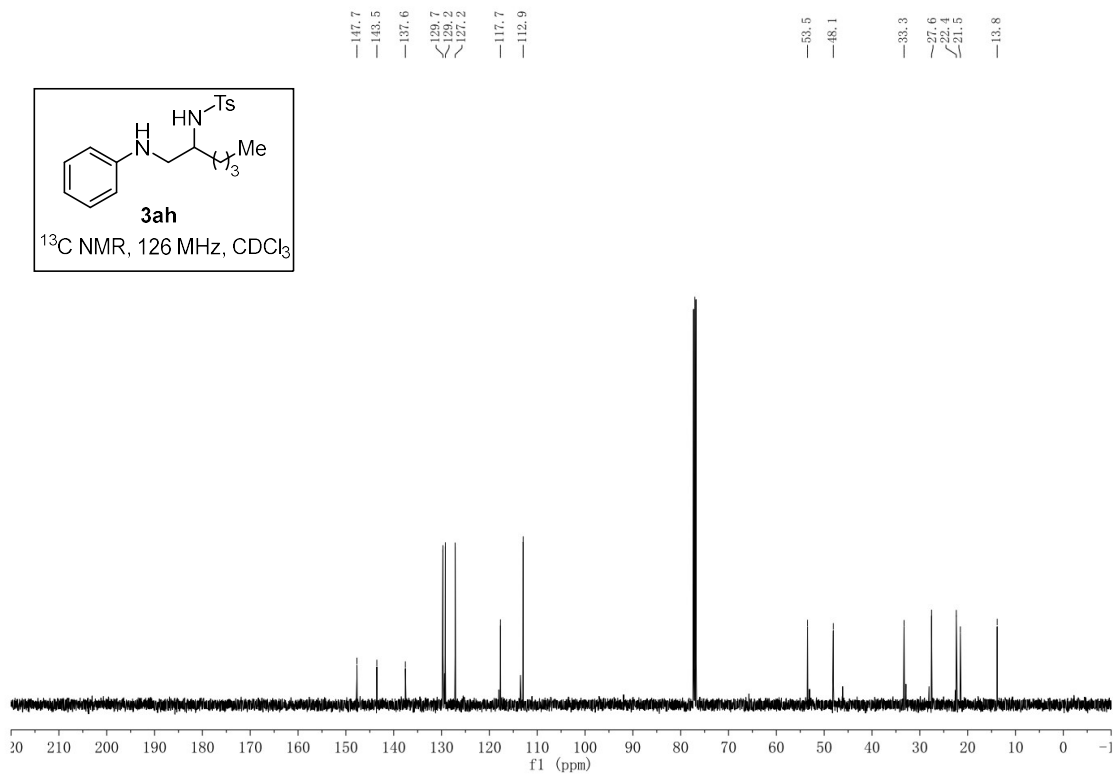

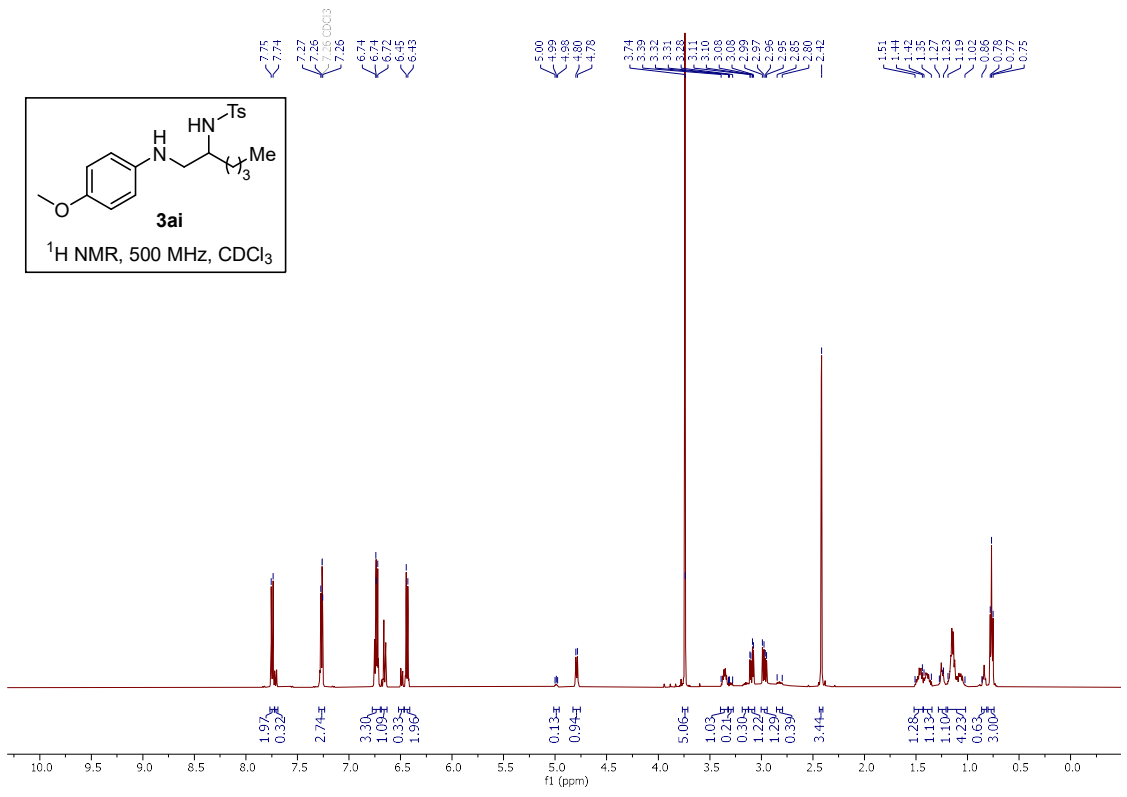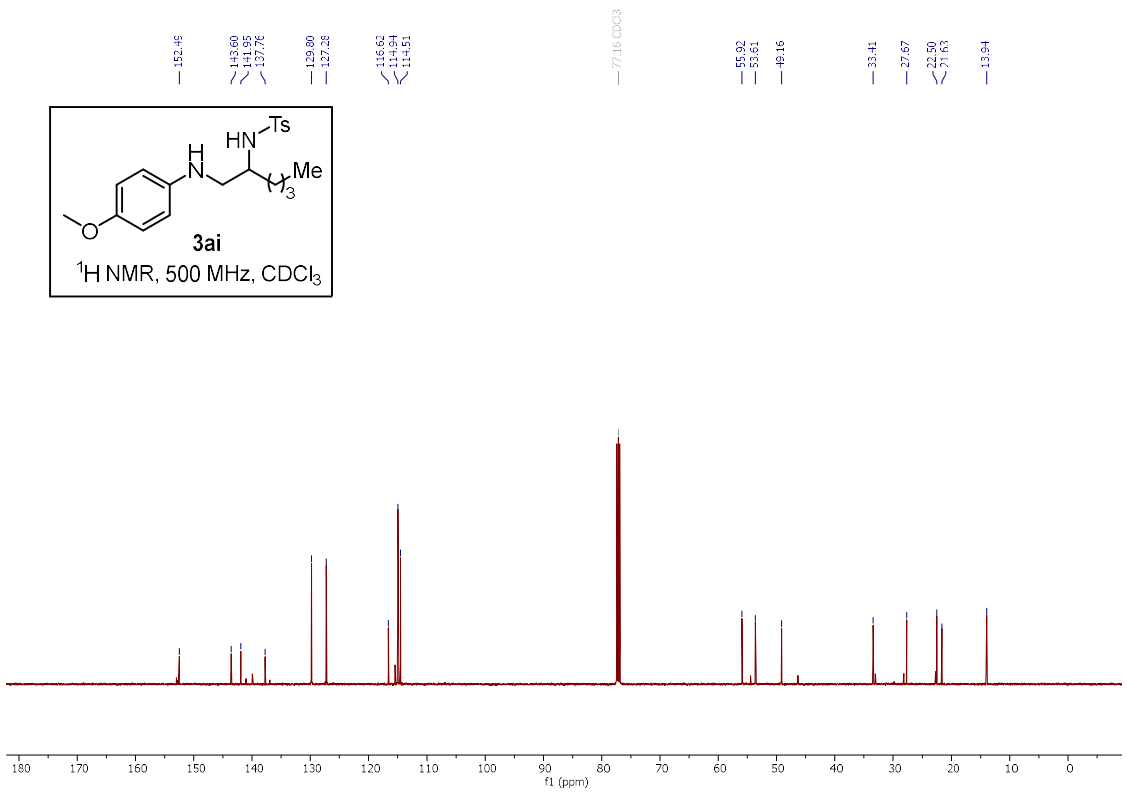

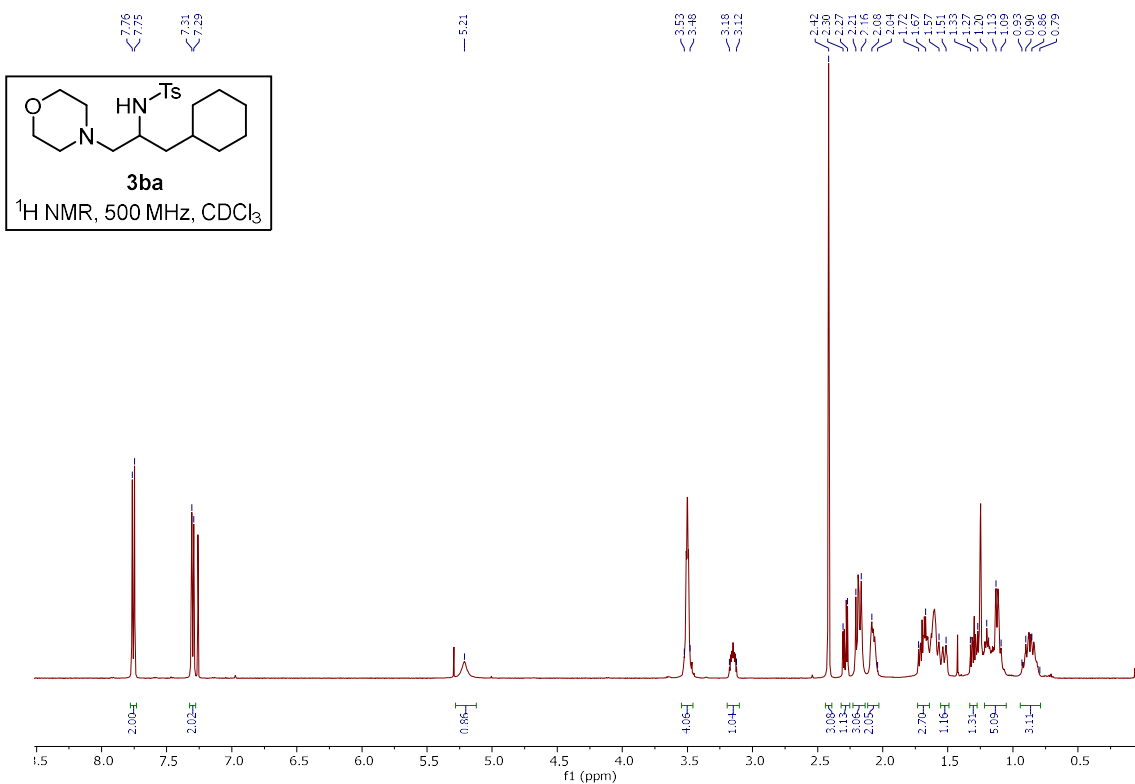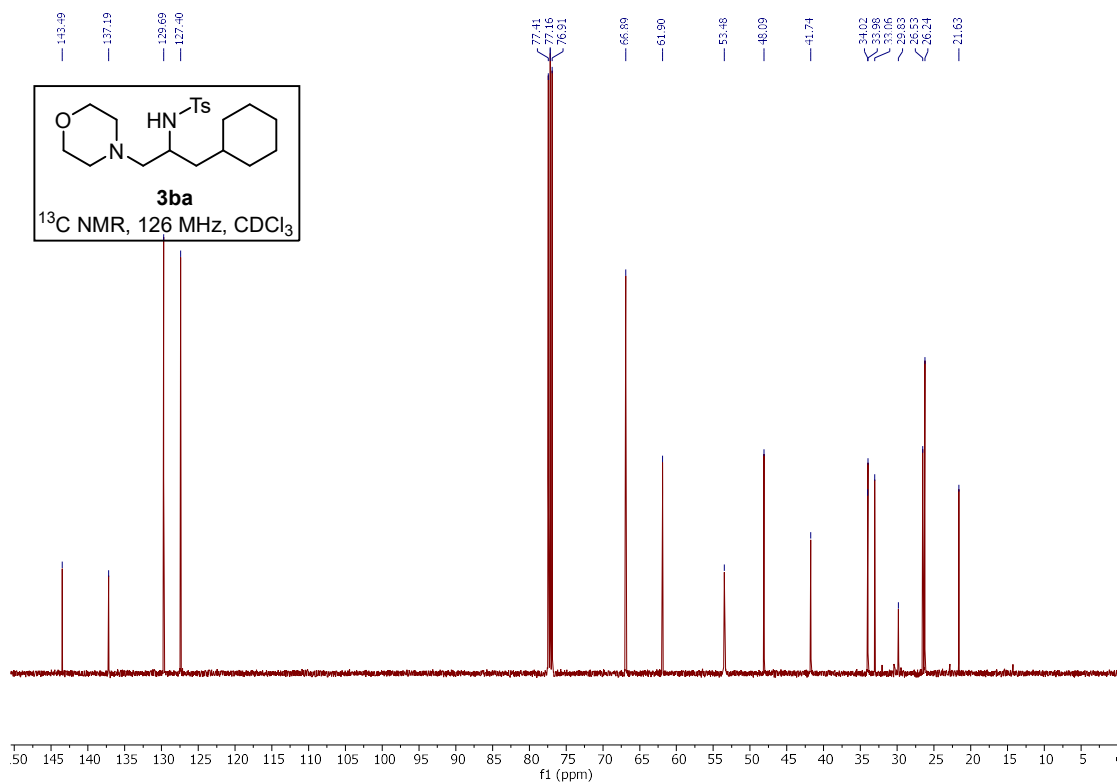

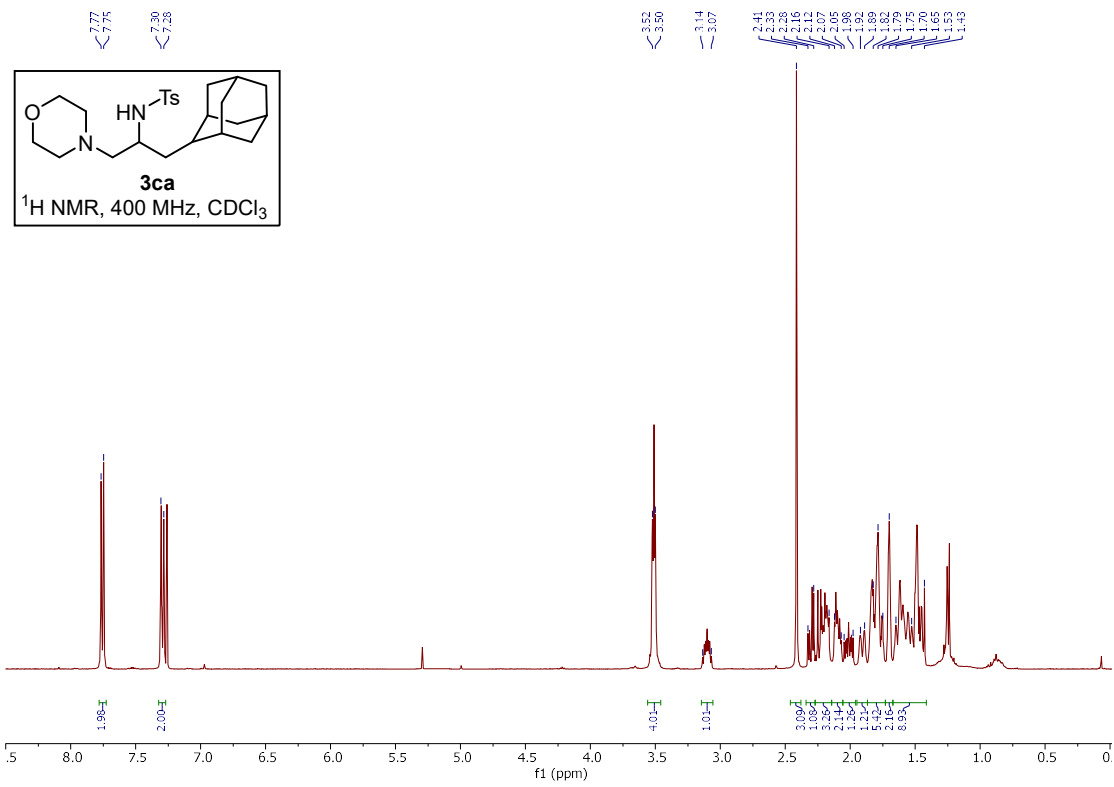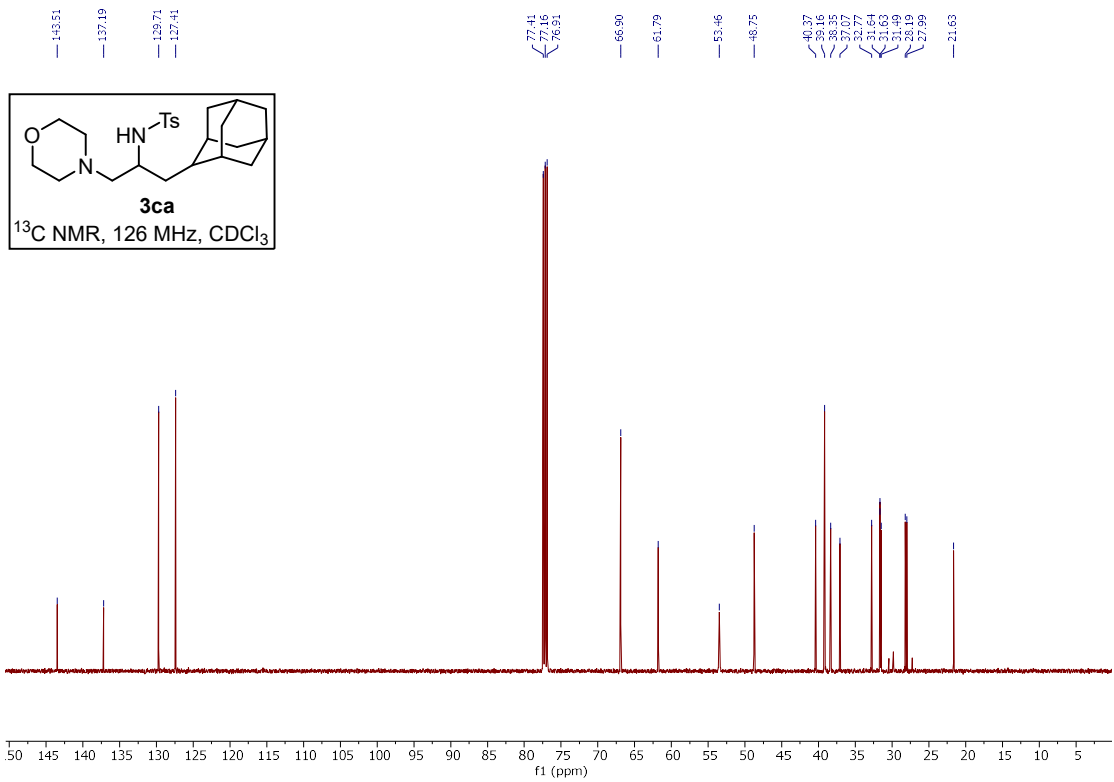

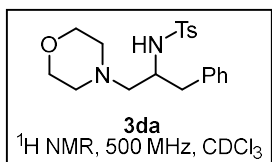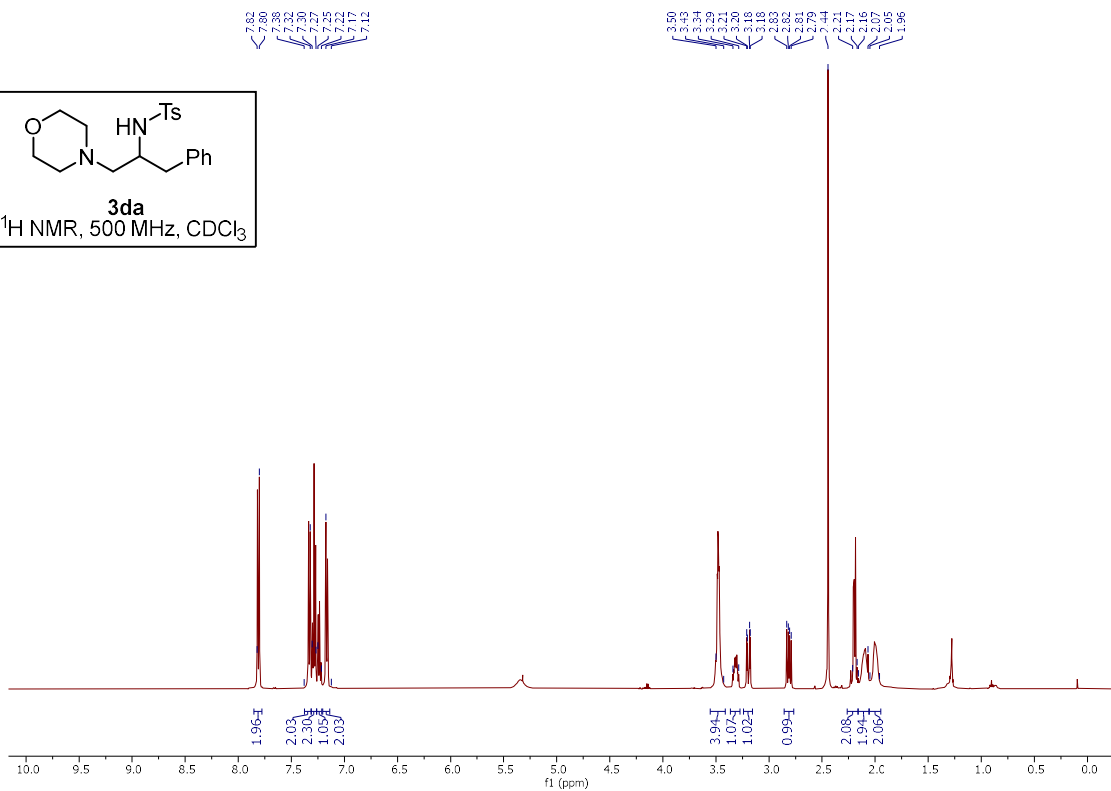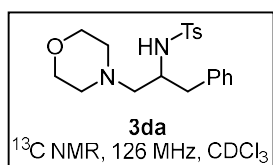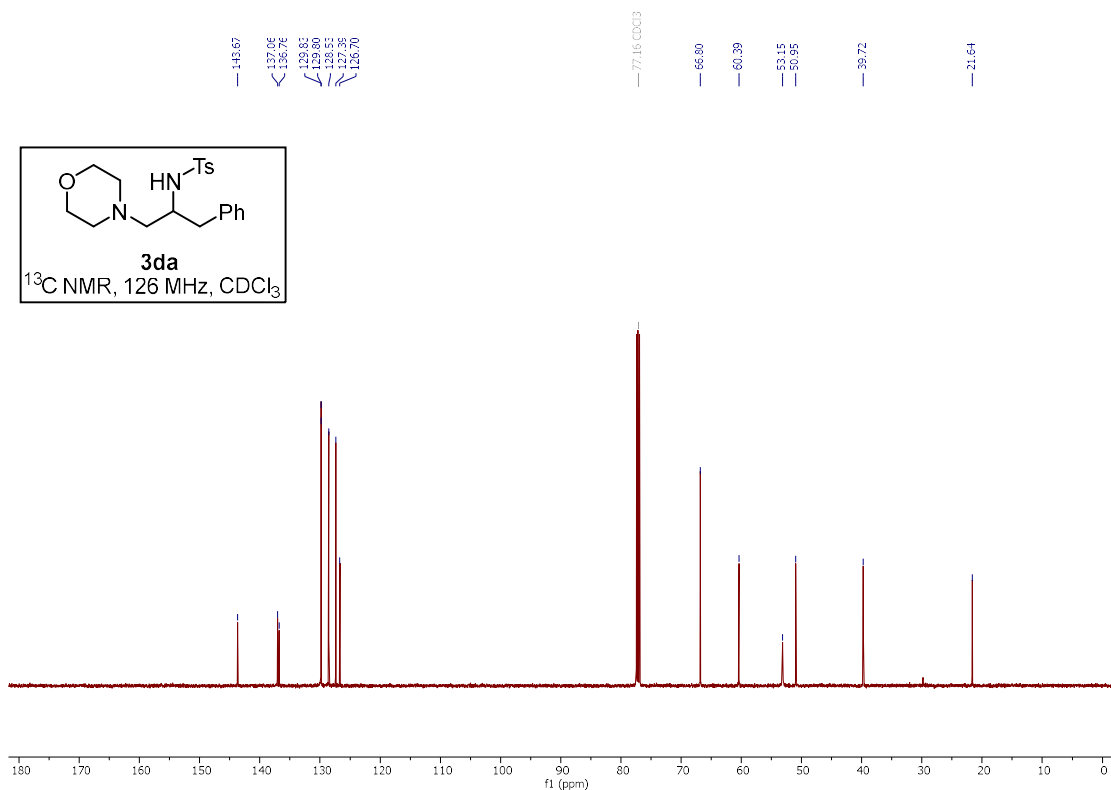

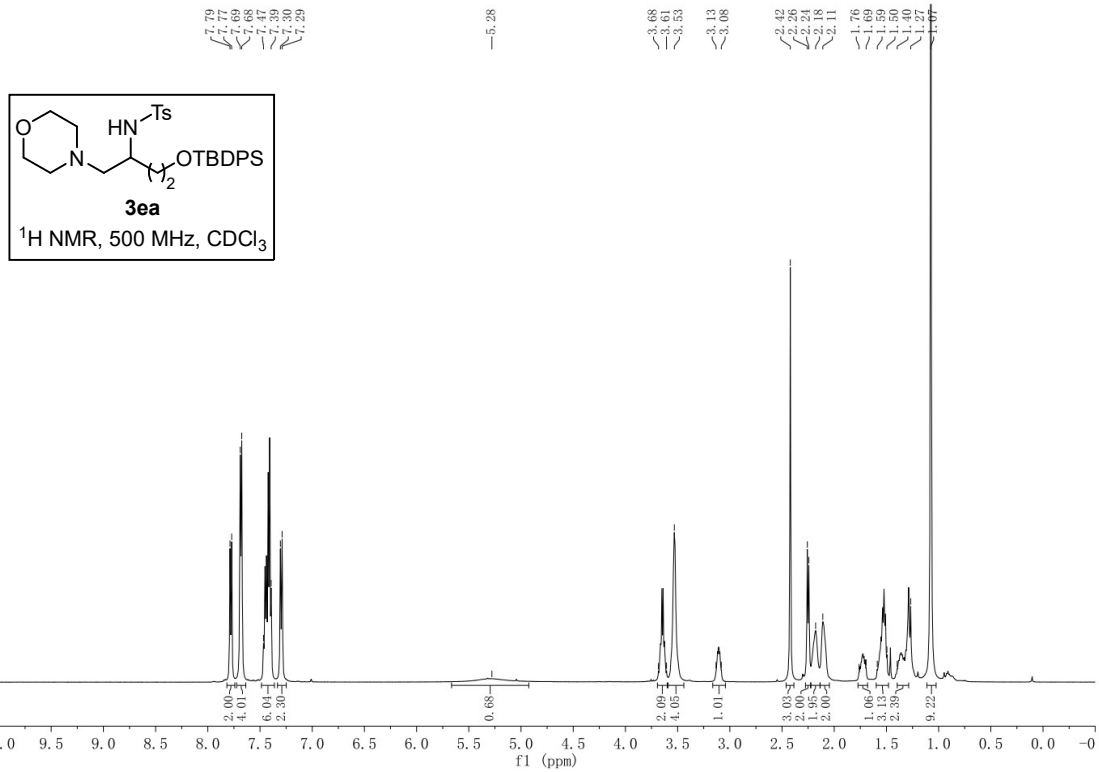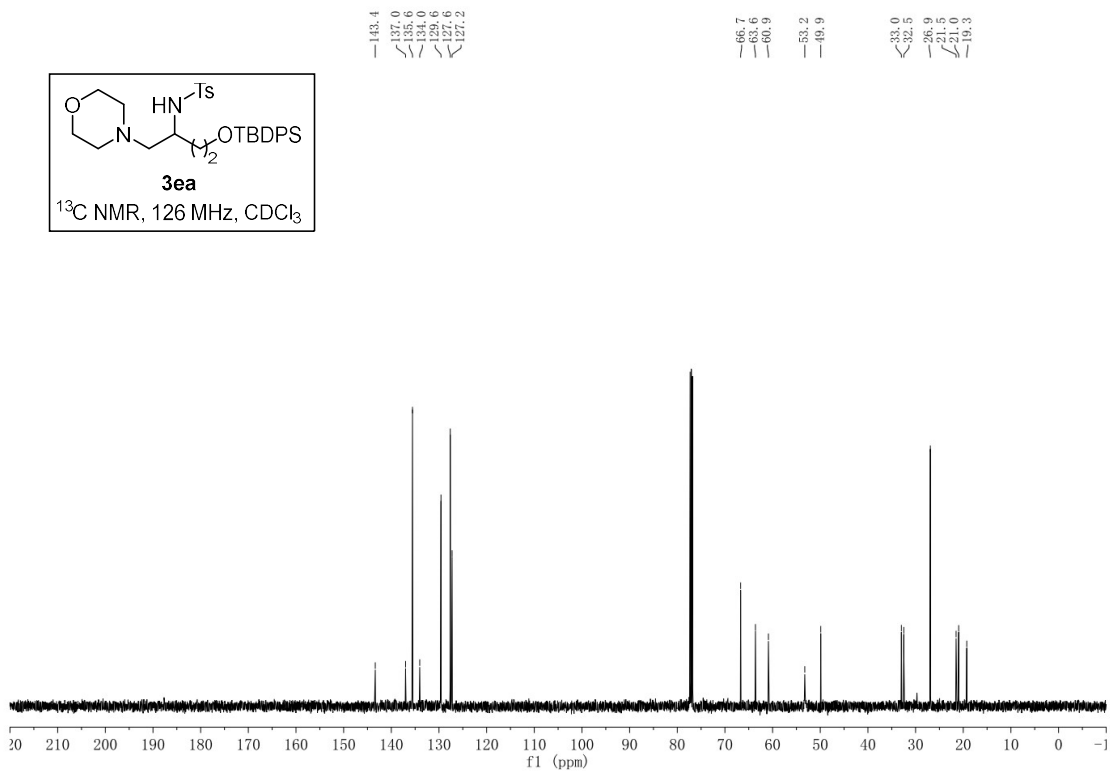

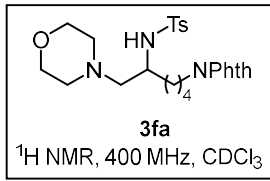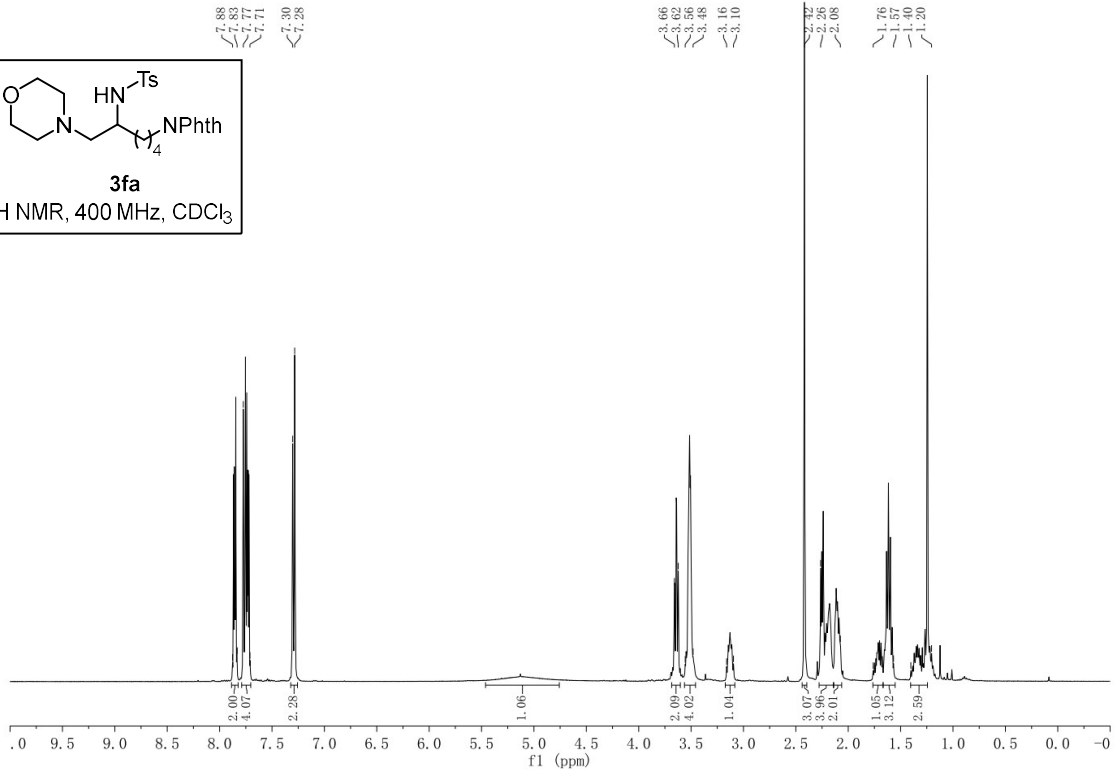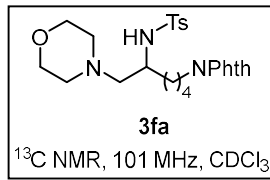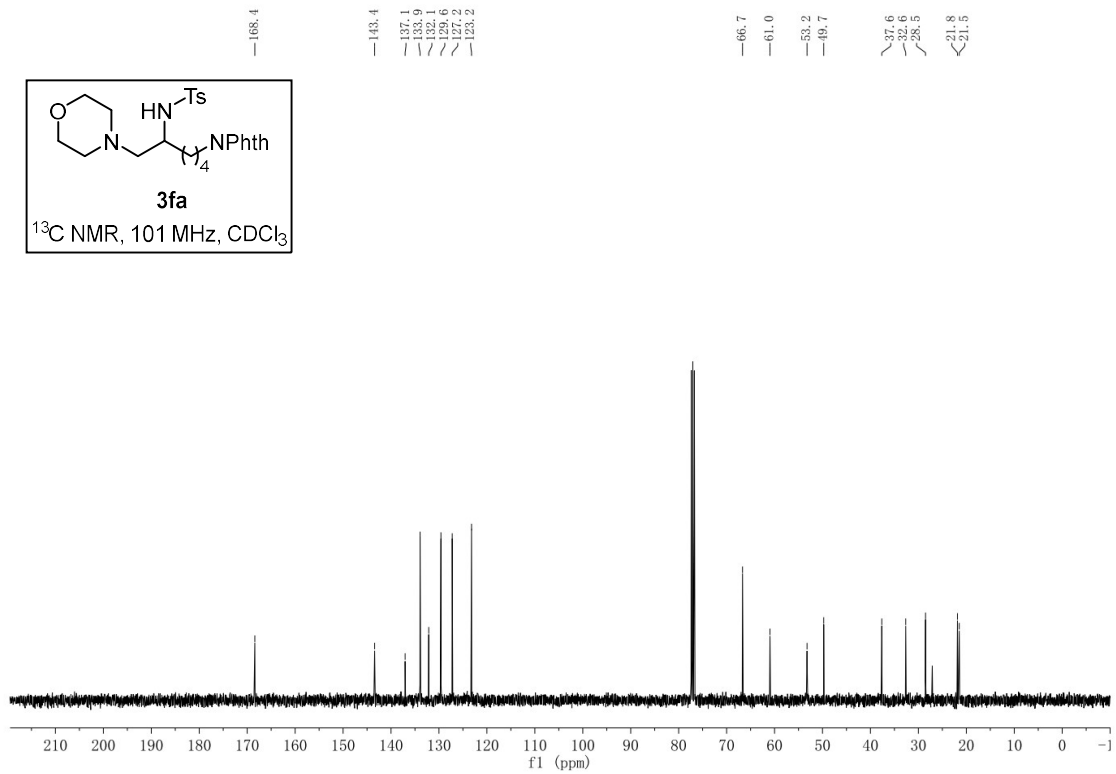

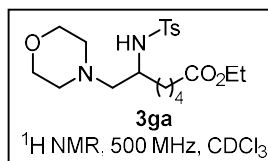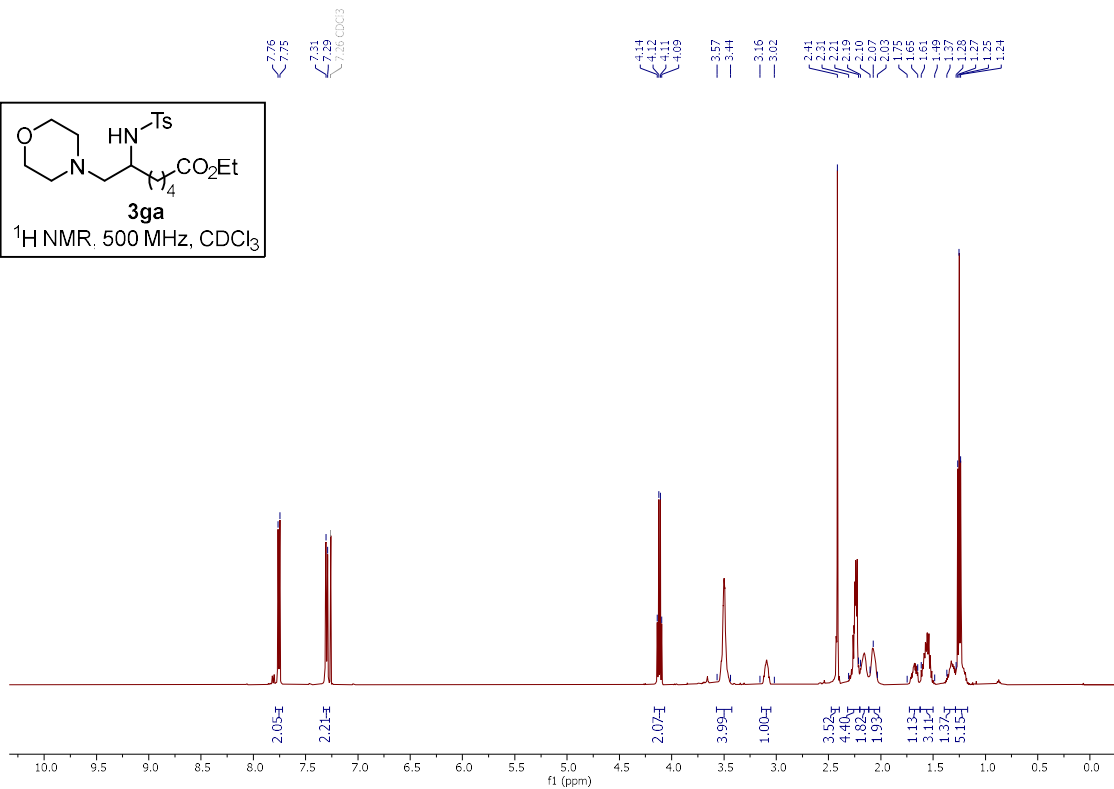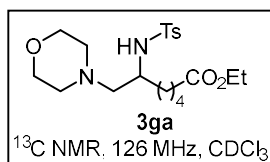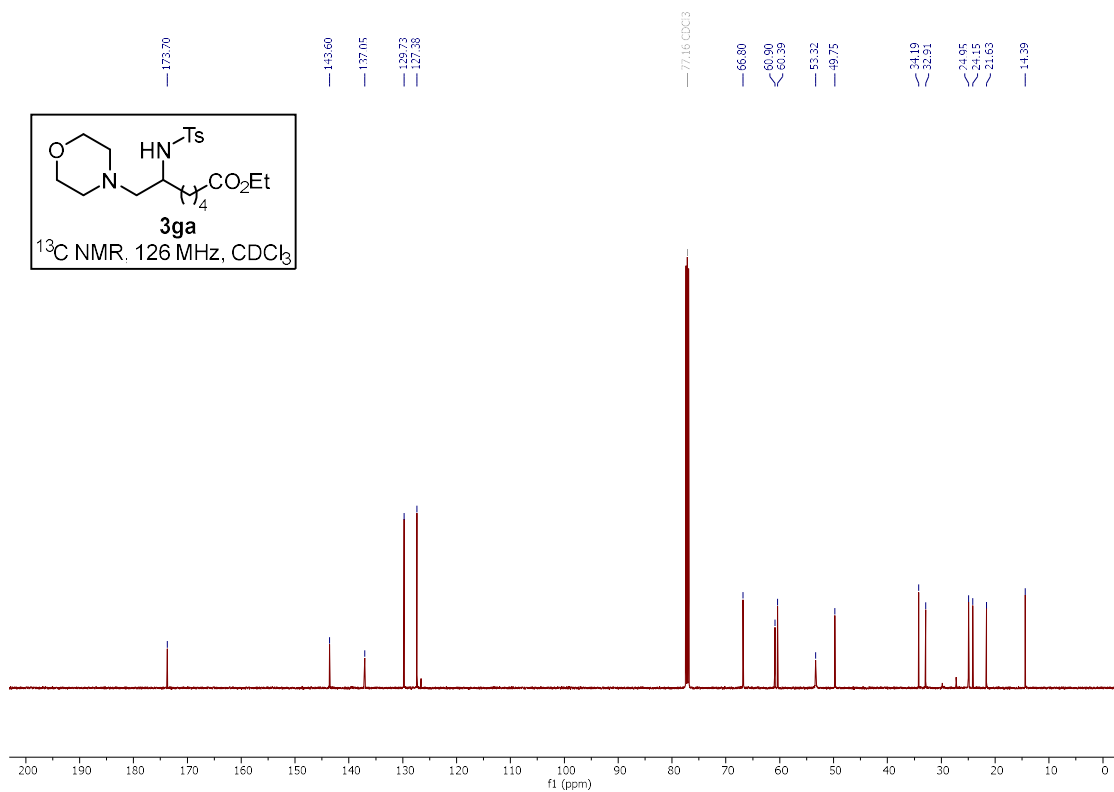

Supplement: NIHMS1609704-supplement-SI.pdf [file NIHMS1609704-supplement-SI.pdf]
